# Supplementary material for: Unraveling high-performance oxygen-deficient amorphous manganese oxide as the cathode for advanced zinc ion batteries
Source: Royal Society of Chemistry journal article supplement (doi:10.1039/d2ta07838d), 2023-01-01
Supplement: d2ta07838d1.pdf [file d2ta07838d1.pdf]

Supporting Information for:

**Unraveling the high-performance oxygen-deficient amorphous manganese oxide as  
cathode for advanced zinc ion batteries**

Mehdi Karbak<sup>a,b</sup>, Mariam Baazizi<sup>a,c</sup>, Simon Sayah<sup>a</sup>, Cecile Autret-Lambert<sup>d</sup>, Yann Tison<sup>e</sup>,  
Herve Martinez<sup>e,f</sup>, Tarik Chafik<sup>b</sup>, and Fouad Ghamouss<sup>a,c\*</sup>

---

<sup>a.</sup> *Laboratory of Physical-Chemistry of Materials and Electrolytes for Energy (PCM2E), University of Tours, 37200 Tours, France.*

<sup>b.</sup> *Laboratory of Chemical Engineering and Resources Valorization (LGCVR), Faculty of Sciences and Techniques, University Abdelmalek Essaadi, B.P. 416, Tangier 90010, Morocco.*

<sup>c.</sup> *Department of Materials Science, Energy, and Nano-Engineering, Mohamed VI Polytechnic University, Ben Guerir 43150, Morocco.*

<sup>d.</sup> *Materials Research Group, Microelectronics, Acoustics and Nanotechnologies, GREMAN, (UMR 7347), University of Tours, 37200 Tours, France*

<sup>e.</sup> *Université de Pau et des Pays de l'Adour, E2S UPPA, CNRS, IPREM, Pau, France*

<sup>f.</sup> *Centrale Casablanca, Centre de Recherche Systèmes Complexes et Interaction, Bouskoura 27182, Morocco*

## Materials and methods

### Materials

Potassium permanganate ( $\text{KMnO}_4$ , AR,  $\geq 99\%$ ), absolute ethanol ( $\text{C}_2\text{H}_5\text{OH}$ ,  $\geq 99.5\%$ ) and sodium borohydride ( $\text{NaBH}_4$ ,  $\geq 98.0\%$ ) were all purchased from SIGMA ALDRICH. All reagents were used as received without any further treatment.

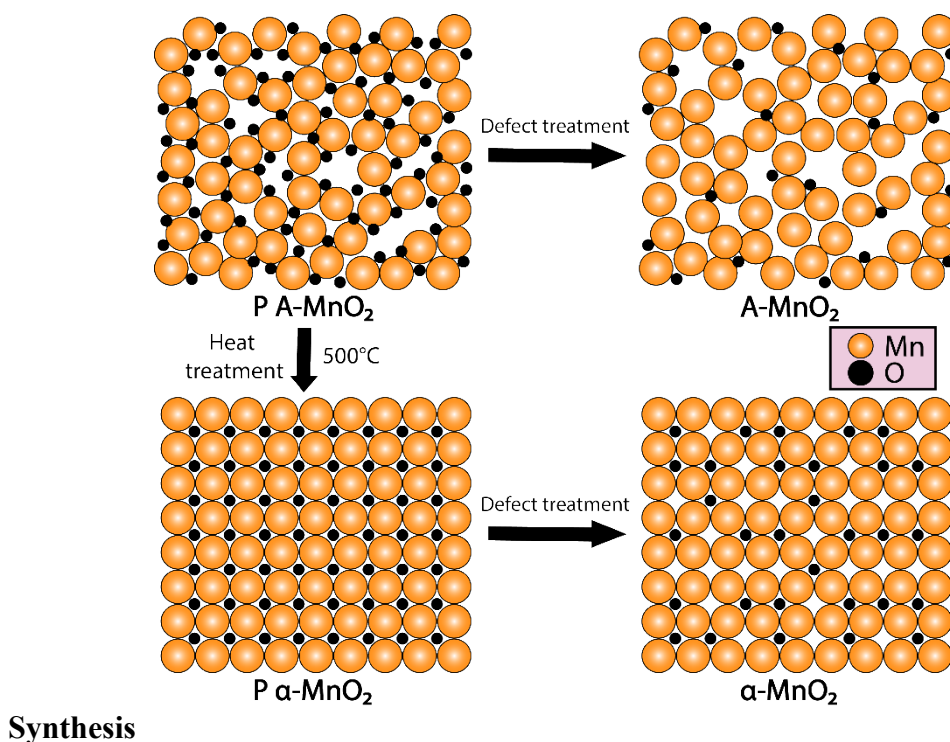

Figure S1: Schematic illustration of the material synthesis

1g of  $\text{KMnO}_4$  was dissolved in 50 ml of distilled water with vigorous stirring at room temperature followed by adding 100 ml of absolute ethanol. After 2 hours of stirring, a brown precipitate was acquired. The precipitate was filtered and washed with distilled water until the pH of the filtrate equaled 7. Then the resulted material was vacuum-dried at  $60^\circ\text{C}$  overnight to form a pristine amorphous  $\text{MnO}_2$  (P A-MnO<sub>2</sub>). The latter was ground by an agate mortar and calcined under air at  $500^\circ\text{C}$  for 2h. The calcined material is named P α-MnO<sub>2</sub>. Subsequently, both materials went through an oxygen deficiency treatment previously reported by Junmin

Xue et al.<sup>1</sup> Basically, 1g of the synthesized P MnO<sub>2</sub> was dispersed in 100 ml distilled water. Afterward, 50 ml of 0.1 M NaBH<sub>4</sub> solution was prepared and added dropwise to the MnO<sub>2</sub> dispersion. The mixture was stirred for 1 hour and left still for an extra hour. Hence, A-MnO<sub>2</sub> and  $\alpha$ -MnO<sub>2</sub> were obtained.

## Methods

Morphologies of all samples were examined by scanning electron microscopy (SEM). The nitrogen adsorption equilibrium isotherms were obtained using a QUADRASORB EVO analyzer measured at 77 K. All samples were degassed at 353 K for 4 h under vacuum before all porosity measurements. The specific surface area ( $S_{\text{BET}}$ ) was determined by the Brunauer–Emmett–Teller (BET) theory, considering the molecular cross-sectional area of N<sub>2</sub> at 77 K to be 0.162 nm<sup>2</sup>. Pore size distribution and pore volume were calculated using the nonlocal density functional theory (NLDFT) with the carbon slit pore model. RAMAN spectra were obtained using a HORIBA LabRAM HR Evolution at room temperature with a laser source of 514 nm. Crystallographic properties of all samples were investigated by X-ray diffraction using an X-ray diffractometer D8 Advance operating at 40kV and recorded and 40 mA using Ni-filtered Cu K $\alpha$  radiation ( $\lambda$  = 0.15406 nm). Data was recorded in the  $2\theta$  range of 5° and 80° at a scanning rate of 1.5°/min with a step size of 0.02°. XPS was performed using a Thermo K-Alpha X-ray Photoelectron Spectrometer system using a monochromatic Al K $\alpha$  x-ray source (*ca.* 1687 eV). The analyser's pass energy was set to 20 eV allowing for an energy resolution of 0.1eV. CasaXPS® was used to process the data. The binding energy scale was calibrated from the C 1s main peak of adventitious carbon at 285.0 eV (C-C/C-H). Scofield photoionization cross sections (corrected for the instrument transmission function and for the differences of analysis depths between elements) were used to calculate composition tables.<sup>2</sup>

Transmission electron microscopy samples were prepared by crushing the powder with ethanol and the small crystallites in suspension were deposited on a holey carbon film, supported by a

copper grid. The electron diffraction and the high-resolution electron microscopy were performed with a JEOL 2100F electron microscope equipped with a tilting and rotating goniometer (200 kV and point resolution of 1.8 Å) and coupled with EDX analysis (Oxford).

To investigate the materials' electrochemical properties, electrodes ( $\gamma$ -MnO<sub>2</sub> and  $\alpha$ -MnO<sub>2</sub>) were prepared by mixing 75 wt% active material, 15 wt% carbon black and 10 wt% polytetrafluoroethylene (PTFE). The prepared paste was then kneaded into a paper-like form and dried at 60°C for 12 hours, before being pressed at ten tones on a 10 mm diameter stainless steel round mesh. The resulting electrodes had an active material loading above 2.5 mg.cm<sup>-2</sup>. A zinc foil of 0.25 mm thickness was cut into a 10 mm diameter disc to be used as anode for the aqueous zinc-MnO<sub>2</sub> battery.

Electrochemical testing was undertaken using a Biologic VMP. CV and GCD tests were conducted in a potential window between 0.8 and 1.8 V.

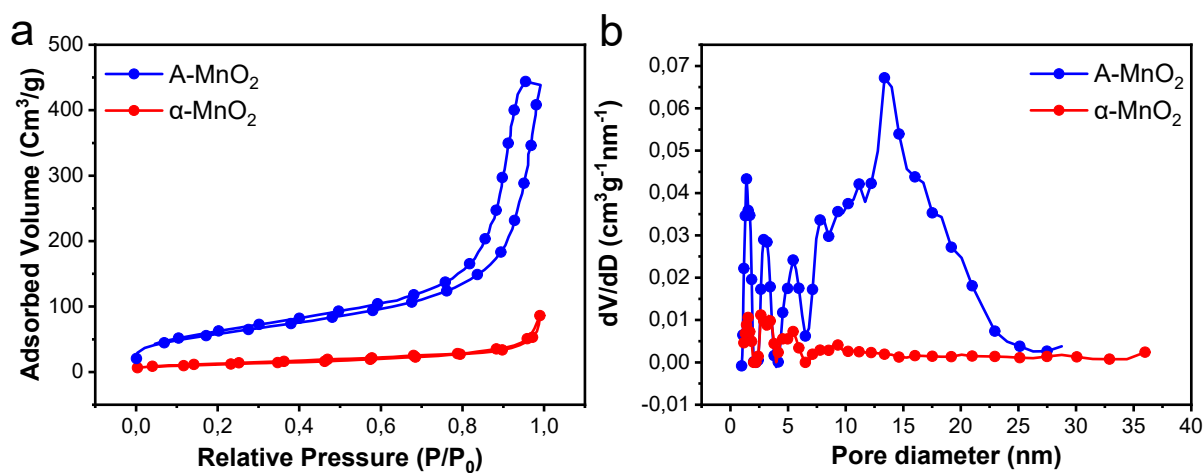

Figure S2: Sorption isotherms and pore size distribution of A-MnO<sub>2</sub> and α-MnO<sub>2</sub>

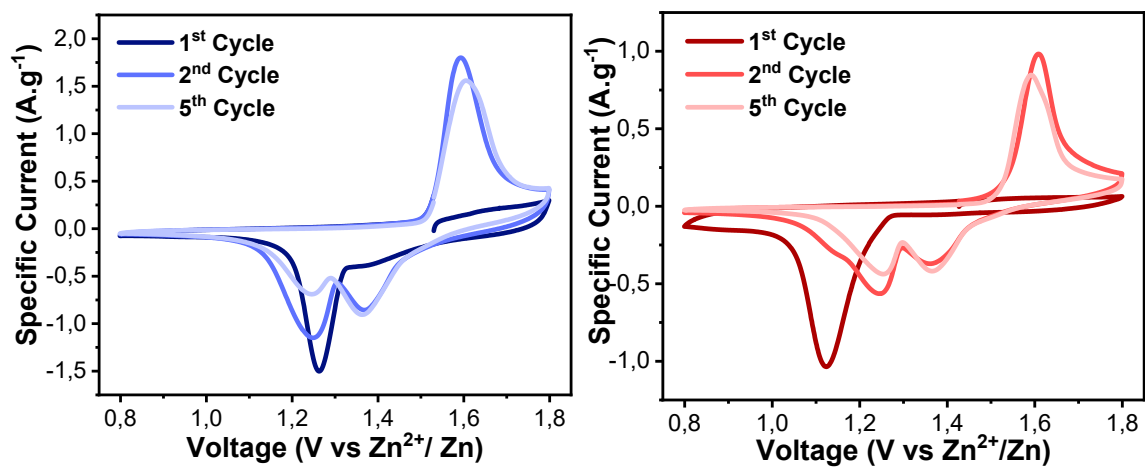

Figure S3: CV curves of A-MnO<sub>2</sub> (Blue) and α-MnO<sub>2</sub> (Red) at 0.3 mV.s<sup>-1</sup>

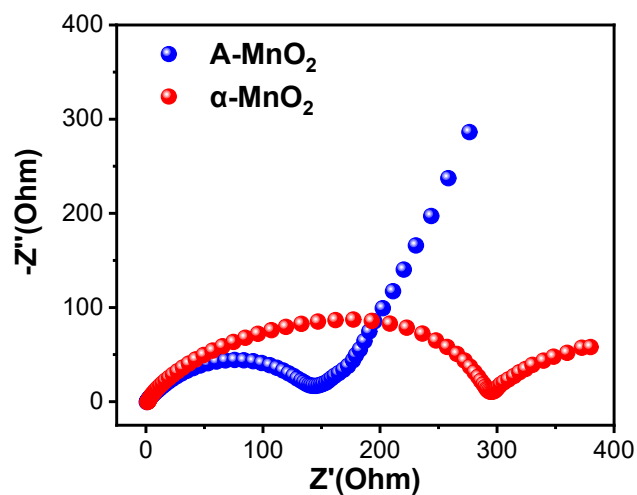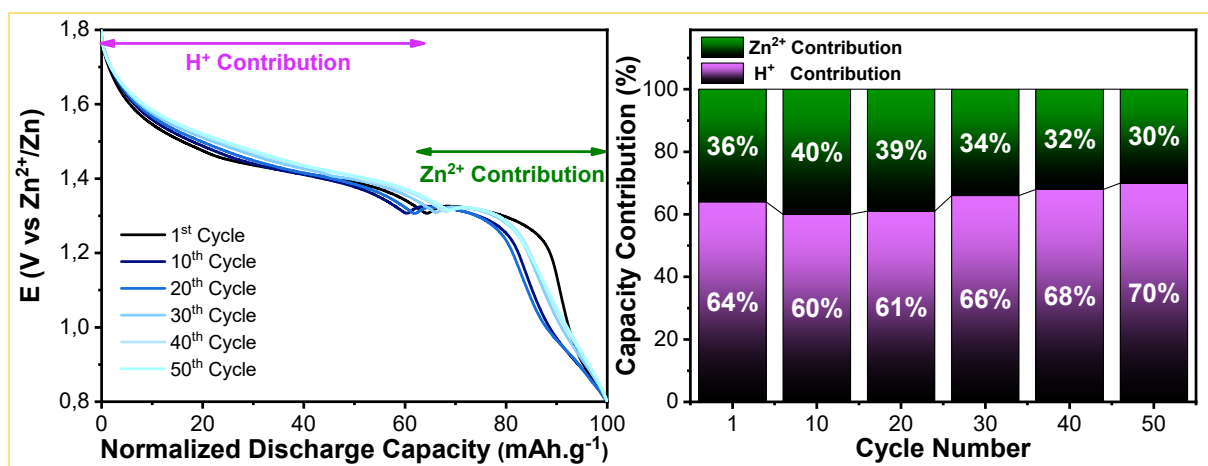

Figure S4: Nyquist plot of A-MnO<sub>2</sub> and α-MnO<sub>2</sub> at open circuit voltage

Figure S5: a) Normalized GCD patterns after long-term cycling of A-MnO<sub>2</sub> at 100 mA.g<sup>-1</sup>, b) Capacity contribution of A-MnO<sub>2</sub> after-long term cycling

Table S1: XPS composition table obtained for A-MnO<sub>2</sub>

| Core Peak           | Mn 2p            |                  | O 1s  |                |       | C 1s        |       |       |
|---------------------|------------------|------------------|-------|----------------|-------|-------------|-------|-------|
| component           | Mn <sup>3+</sup> | Mn <sup>4+</sup> | O-Mn  | O <sup>-</sup> | O-C   | C-<br>C,C-H | C-O   | C=O   |
| Binding Energy (eV) | 641.3            | 642.2            | 529.8 | 531.4          | 532.8 | 285.0       | 286.2 | 288.6 |
| Atomic %            | 13.6             | 7.4              | 34.6  | 15.1           | 0.9   | 21.7        | 1.8   | 5.0   |
| Total               | 21.0             |                  | 50.6  |                |       | 28.5        |       |       |
| Atomic %            |                  |                  |       |                |       |             |       |       |

Table S2: XPS composition table obtained for □-MnO<sub>2</sub>

| Core Peak           | Mn 2p            |                  | O 1s     |                |       | C 1s            |       |       |
|---------------------|------------------|------------------|----------|----------------|-------|-----------------|-------|-------|
| component           | Mn <sup>3+</sup> | Mn <sup>4+</sup> | O-<br>Mn | O <sup>-</sup> | O-C   | C-<br>C,C-<br>H | C-O   | C=O   |
| Binding Energy (eV) | 641.3            | 642.1            | 529.6    | 531.4          | 532.8 | 285.0           | 286.3 | 288.6 |
| Atomic %            | 6.3              | 5.1              | 21.3     | 8.0            | 4.8   | 46.0            | 5.9   | 2.6   |
| Total Atomic %      | 11.4             |                  | 34.1     |                |       | 54.5            |       |       |

## References

1. Xiong T, Yu ZG, Wu H, et al. Defect Engineering of Oxygen-Deficient Manganese Oxide to Achieve High-Performing Aqueous Zinc Ion Battery. *Advanced Energy Materials*. 2019;9(14):1803815. doi:10.1002/aenm.201803815
2. Scofield JH. Hartree-Slater subshell photoionization cross-sections at 1254 and 1487 eV. *Journal of Electron Spectroscopy and Related Phenomena*. 1976;8(2):129-137. doi:10.1016/0368-2048(76)80015-1
